# Supplementary material for: Effects of Chinese Milk Vetch Returning on Soil Properties, Microbial Community, and Rice Yield in Paddy Soil
Source: MDPI journal article supplement (doi:10.3390/su142316065), 2022-12-01
Supplement: s1 [file s1]

# Effects of Chinese Milk Vetch Returning on Soil Properties, Microbial Community, and Rice Yield in Paddy Soil

Jishi Zhang <sup>1</sup>, Chunfeng Zheng <sup>1</sup>, Lin Zhang <sup>2</sup>, Chenglan Zhang <sup>1</sup>, Yuhu Lv <sup>2</sup>,  
Liangpeng Nie <sup>2</sup>, Xiangning Zhang <sup>1</sup>, Benyin Li <sup>1</sup>, Weidong Cao <sup>3</sup>, Min Li <sup>4</sup>, Chunzeng Liu <sup>1,\*</sup>  
and Yuting Zhang <sup>1,\*</sup>

<sup>1</sup> Institute of Plant Nutrition, Resources and Environment, Henan Academy of Agricultural Sciences, Zhengzhou 450002, China

<sup>2</sup> Institute of Plant Nutrition, Resources and Environment, Xinyang Academy of Agricultural Sciences, Xinyang 464000, China

<sup>3</sup> Institute of Agricultural Resources and Regional Planning, Chinese Academy of Agricultural Sciences, Beijing 100081, China

<sup>4</sup> Institute of Soil and Fertilizer, Anhui Academy of Agricultural Sciences, Hefei 230031, China

\* Correspondence: liucznnky@126.com (C.L.);  
zhangythnky1@126.com (Y.Z.); Tel.: +86-371-55373611 (C.L.);  
Fax: +86-371-55373611 (C.L.)

## Supplemental Material

Figure S1

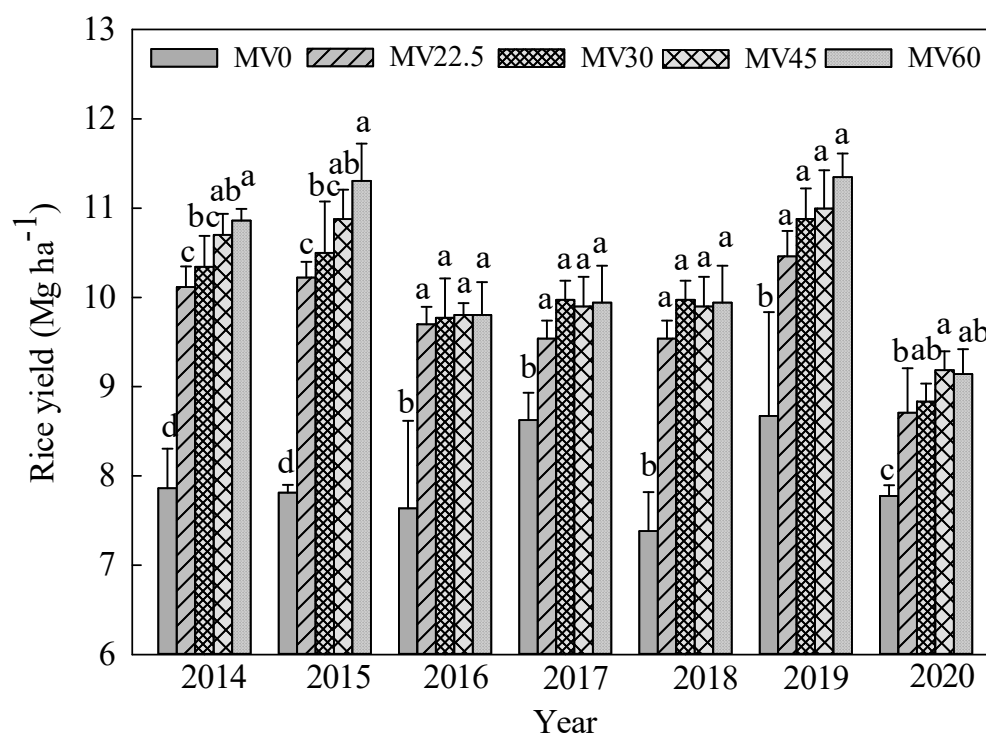

**Figure S1** Rice yield under application of varied Chinese milk vetch (MV) rates from 2014 to 2020. Different letters indicate significant differences between application of varied MV rates at  $P < 0.05$ .

**Table S1** Rice yield as affected by the treatments, year and interaction between treatments and year. ANOVA for all data comes from Figure S1 in the supplemental material.

| ANOVA                        | Sum of squares | Degrees of freedom | Mean of the squares | <i>F</i> value | <i>P</i> value |
|------------------------------|----------------|--------------------|---------------------|----------------|----------------|
| Yield (Mg ha <sup>-1</sup> ) |                |                    |                     |                |                |
| Treatment                    | 105.34         | 4                  | 26.335              | 161.98         | <0.0001        |
| Year                         | 41.243         | 6                  | 6.874               | 42.28          | <0.0001        |
| Treatment * Year             | 10.801         | 24                 | 0.450               | 2.77           | 0.0002         |

**Table S2** Relative abundance of the dominant phyla of bacteria after seven years of application of varied Chinese milk vetch (MV) rates. Phyla of bacteria with relative abundance < 5% are collectively called as “others”.

|        | Chloroflexi | Proteobacteria | Acidobacteriota | Actinobacteriota | Firmicutes  | Desulfobacterota | Nitrospirotae |
|--------|-------------|----------------|-----------------|------------------|-------------|------------------|---------------|
| MV0    | 19.8±2.55a  | 18.1±2.29ab    | 13.5±2.30a      | 11.9±1.60a       | 7.36±2.07b  | 4.20±0.87a       | 3.99±0.62a    |
| MV22.5 | 21.6±0.69a  | 15.8±1.01b     | 13.0±1.13a      | 10.9±1.42a       | 11.0±0.50a  | 4.82±1.00a       | 3.88±0.85a    |
| MV30   | 19.5±2.71a  | 17.5±1.71ab    | 11.9±2.99a      | 10.5±2.15a       | 10.7±1.40ab | 5.02±1.32a       | 4.10±1.01a    |
| MV45   | 20.0±1.99a  | 17.2±1.65ab    | 11.7±1.20a      | 12.0±2.35a       | 11.9±3.36a  | 4.47±0.74a       | 4.02±1.11a    |
| MV60   | 21.5±3.53a  | 18.7±2.33a     | 11.7±1.63a      | 10.4±1.60a       | 10.7±3.09ab | 4.26±0.41a       | 3.43±0.43a    |

Values (mean ± standard deviation) were tested in Analysis of variance (ANOVA) with four replicates in each treatment. Means followed by different letters within a row are significant differences ( $P < 0.05$ ) from each other according to Duncan’s multiple comparison test.

**Table S3** Relative abundance of the dominant phyla of fungi after seven years of application of varied Chinese milk vetch (MV) rates. Phyla of bacteria with relative abundance < 1% are collectively called as “others”.

| Treatment | Ascomycota  | unclassified | Basidiomycota | Mortierellomycota | Chytridiomycota | Rozellomycota |
|-----------|-------------|--------------|---------------|-------------------|-----------------|---------------|
| MV0       | 57.7±11.7a  | 16.8±7.83a   | 10.9±2.72b    | 7.34±3.78a        | 4.74±1.66a      | 1.95±1.90a    |
| MV22.5    | 50.6±16.4ab | 16.8±6.81a   | 20.8±16.1ab   | 6.69±3.30a        | 2.79±0.89b      | 1.80±2.18a    |
| MV30      | 49.8±2.59ab | 21.6±5.65a   | 16.1±7.05ab   | 6.32±3.14a        | 2.93±0.65b      | 2.80±2.60a    |
| MV45      | 34.0±14.2b  | 20.8±7.82a   | 33.3±18.6a    | 8.92±1.81a        | 2.04±0.40b      | 0.68±0.34a    |
| MV60      | 51.4±13.8ab | 22.7±7.65a   | 15.5±6.45b    | 6.21±1.69a        | 3.13±1.45ab     | 0.78±0.46a    |

Values (mean ± standard deviation) were tested in Analysis of variance (ANOVA) with four replicates in each treatment. Means followed by different letters within a row are significant differences ( $P < 0.05$ ) from each other according to Duncan's multiple comparison test.

**Table S4** Spearman correlation coefficients for relationships among bacteria phyla, soil properties and grain yield (n=20).

|          | Phyla             | Yield  | SOC    | TN     | TP    | TK     | AN     | AP    | AK    | BD     |
|----------|-------------------|--------|--------|--------|-------|--------|--------|-------|-------|--------|
| Bacteria | Chloroflexi       | -0.03  | 0.19   | 0.01   | -0.14 | -0.16  | -0.12  | 0.42  | 0.32  | -0.48* |
|          | Proteobacteria    | 0.13   | -0.09  | 0.25   | -0.08 | 0.13   | -0.11  | -0.36 | 0.07  | 0.04   |
|          | Acidobacteria     | -0.38  | -0.19  | -0.31  | -0.16 | -0.29  | -0.21  | 0.23  | -0.16 | 0.05   |
|          | Actinobacteria    | -0.08  | 0.12   | -0.01  | -0.11 | 0.21   | -0.09  | -0.08 | -0.36 | -0.20  |
|          | Firmicutes        | 0.50*  | 0.37   | 0.21   | 0.34  | 0.27   | 0.47*  | -0.03 | 0.19  | -0.09  |
|          | Desulfobacteria   | 0.12   | 0.07   | 0.01   | 0.46* | -0.14  | 0.12   | 0.14  | -0.01 | 0.12   |
|          | Nitrospirae       | -0.13  | -0.30  | -0.05  | 0.26  | 0.01   | 0.06   | -0.01 | 0.05  | 0.31   |
| Fungi    | Ascomycota        | -0.22  | -0.30  | 0.05   | -0.12 | -0.15  | -0.42  | 0.12  | -0.06 | 0.48*  |
|          | unclassified      | 0.11   | 0.16   | 0.18   | -0.21 | 0.13   | 0.19   | 0.03  | 0.14  | -0.53* |
|          | Basidiomycota     | 0.40   | 0.34   | 0.05   | 0.40  | 0.31   | 0.42   | -0.01 | -0.10 | -0.38  |
|          | Mortierellomycota | 0.03   | -0.12  | 0.11   | -0.04 | -0.09  | 0.23   | 0.07  | -0.17 | -0.10  |
|          | Chytridiomycota   | -0.51* | -0.51* | -0.51* | -0.27 | -0.56* | -0.50* | -0.41 | 0.22  | 0.32   |
|          | Rozellomycota     | -0.26  | -0.15  | -0.27  | 0.08  | -0.33  | 0.03   | -0.05 | 0.10  | 0.15   |

\*  $P < 0.05$ ;

SOC, soil organic carbon; TN, total nitrogen; TP, total phosphorus; TK, total potassium; AN, alkali solution nitrogen; AP, available P; AK, available K; BD, bulk density.
